# Supplementary material
Source: HighWire-hosted journal article supplement (https://bmjopen.bmj.com/content/13/4/e065402)
Supplement: inline-supplementary-material-1 [file inline-supplementary-material-1.pdf]

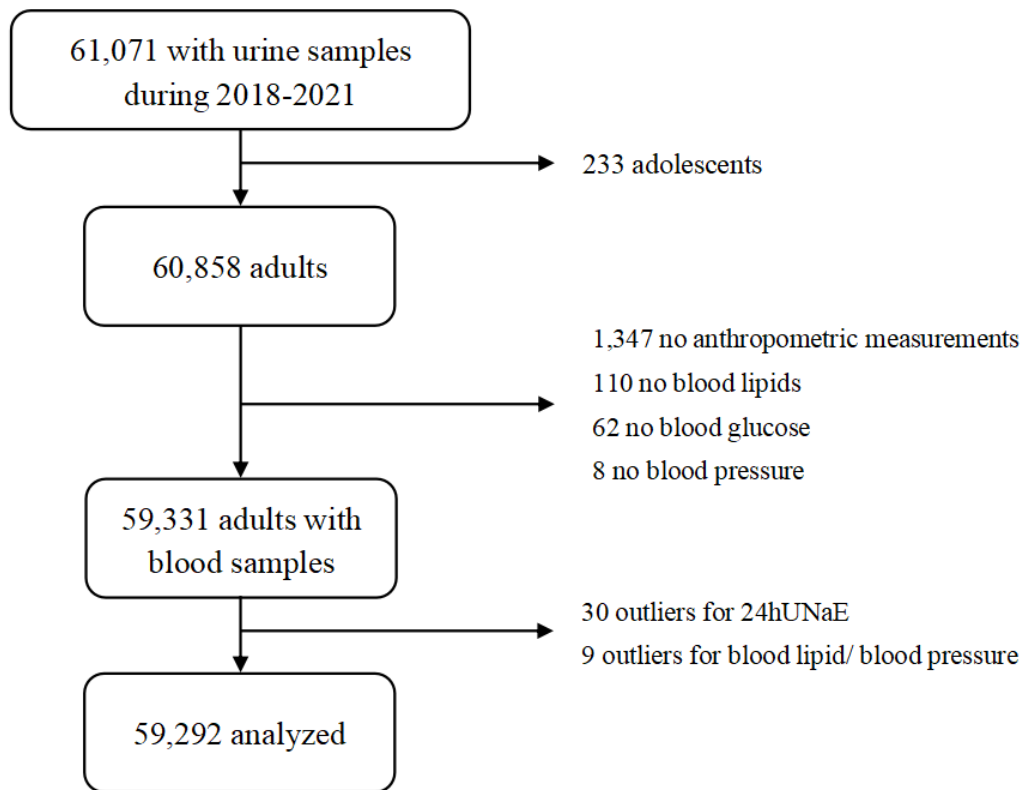

**Appendix S1. The flow chart of participant selection**

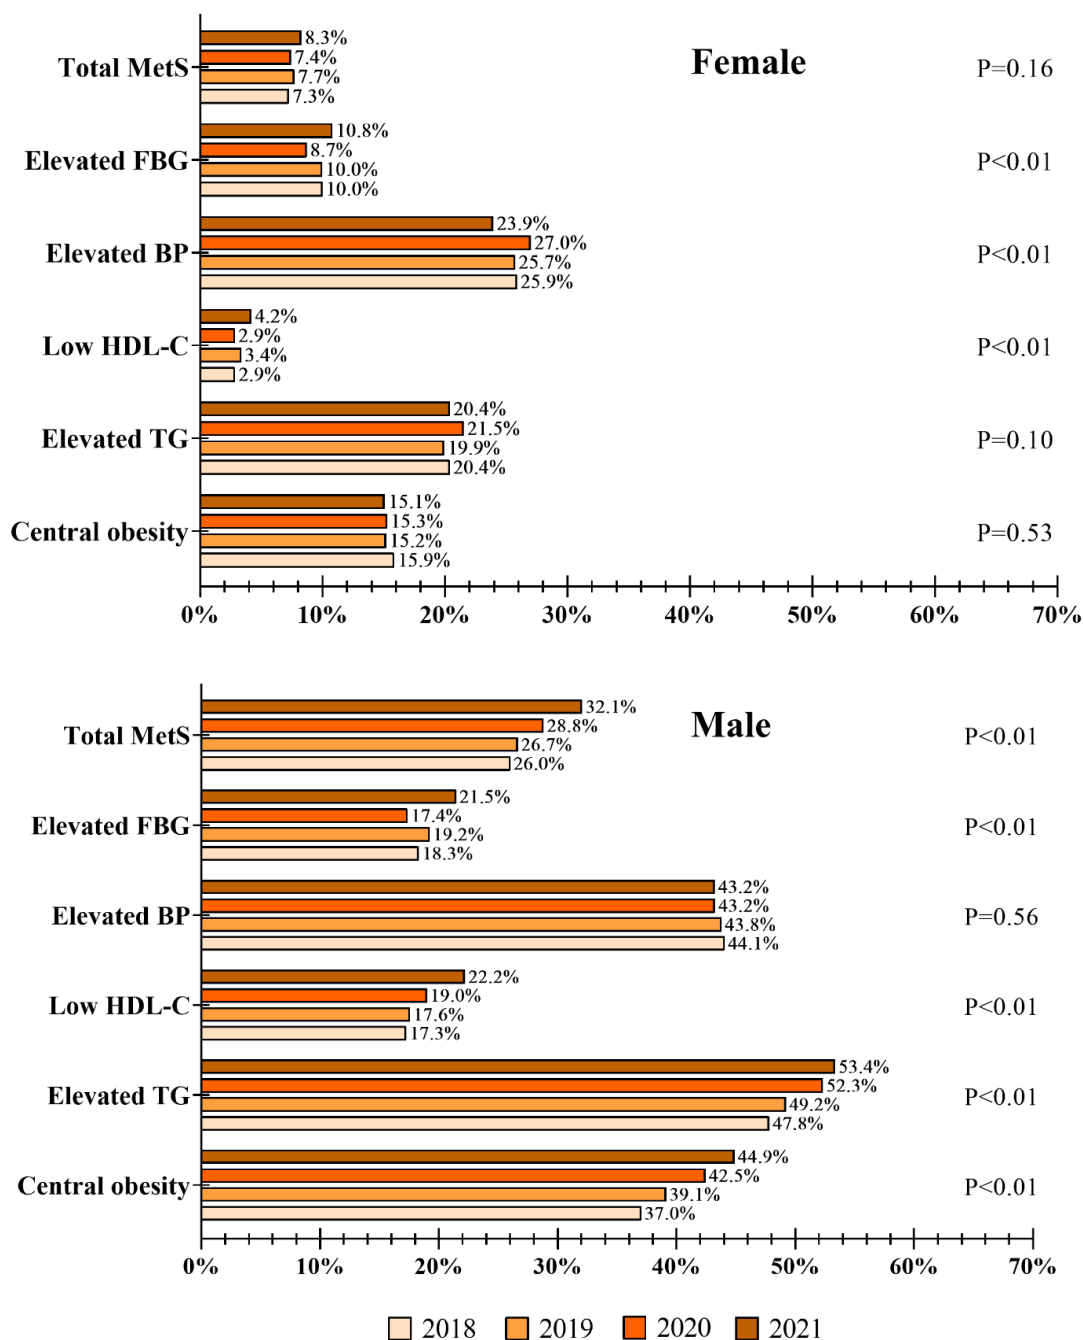

Appendix S2. The prevalence of total MetS and its components across 2018-2021

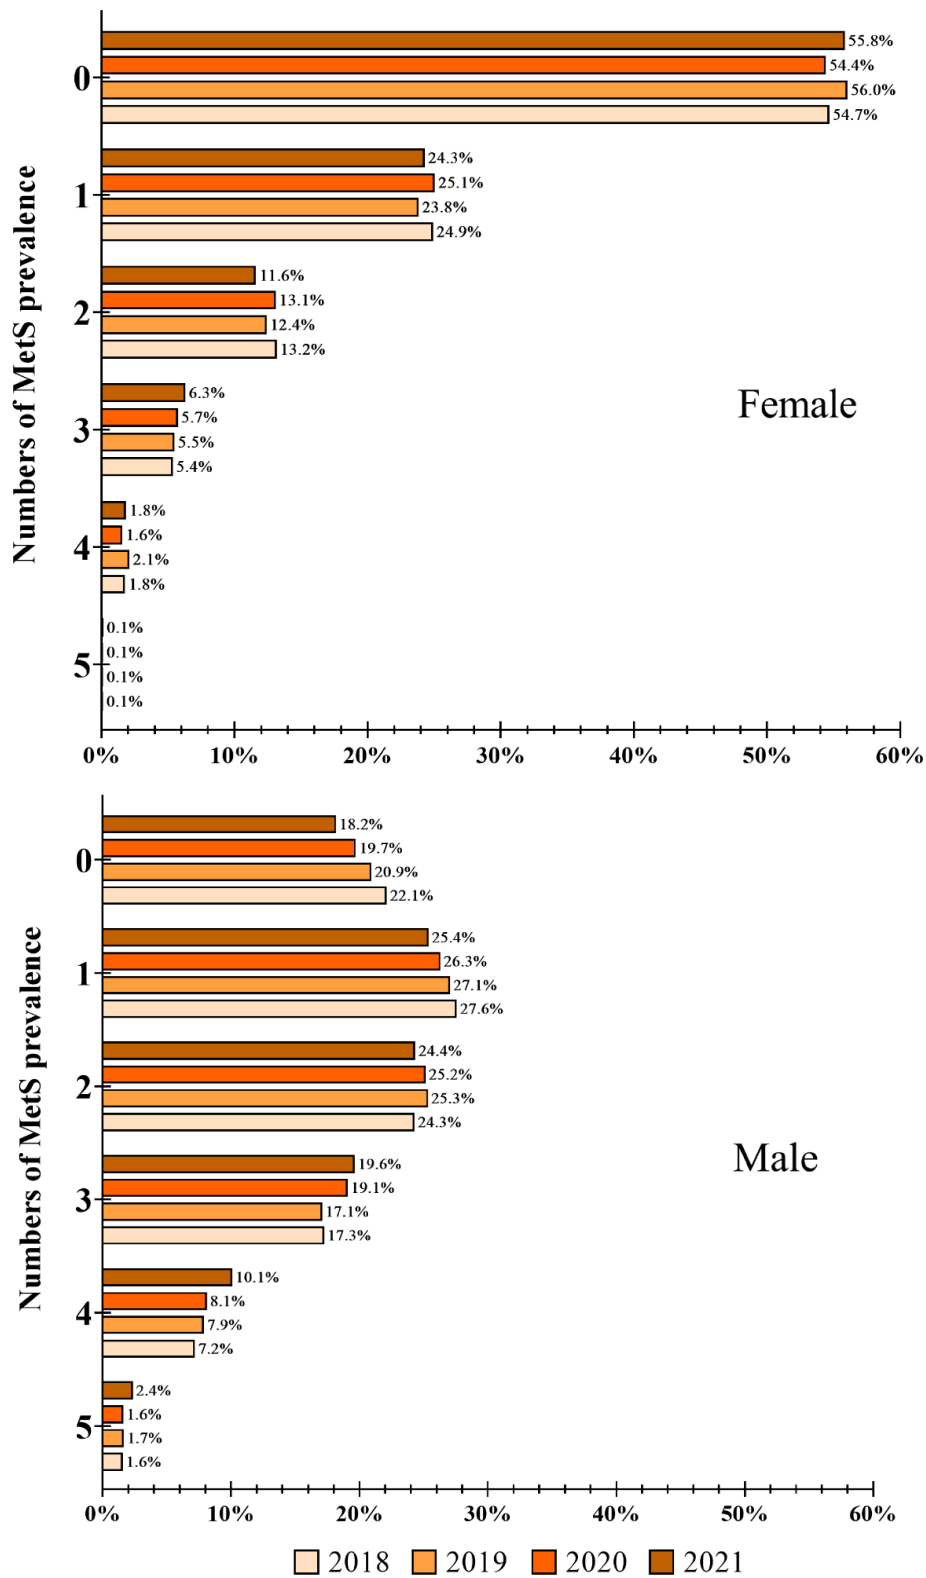

Appendix S3. The proportion of MetS component numbers across 2018-2021

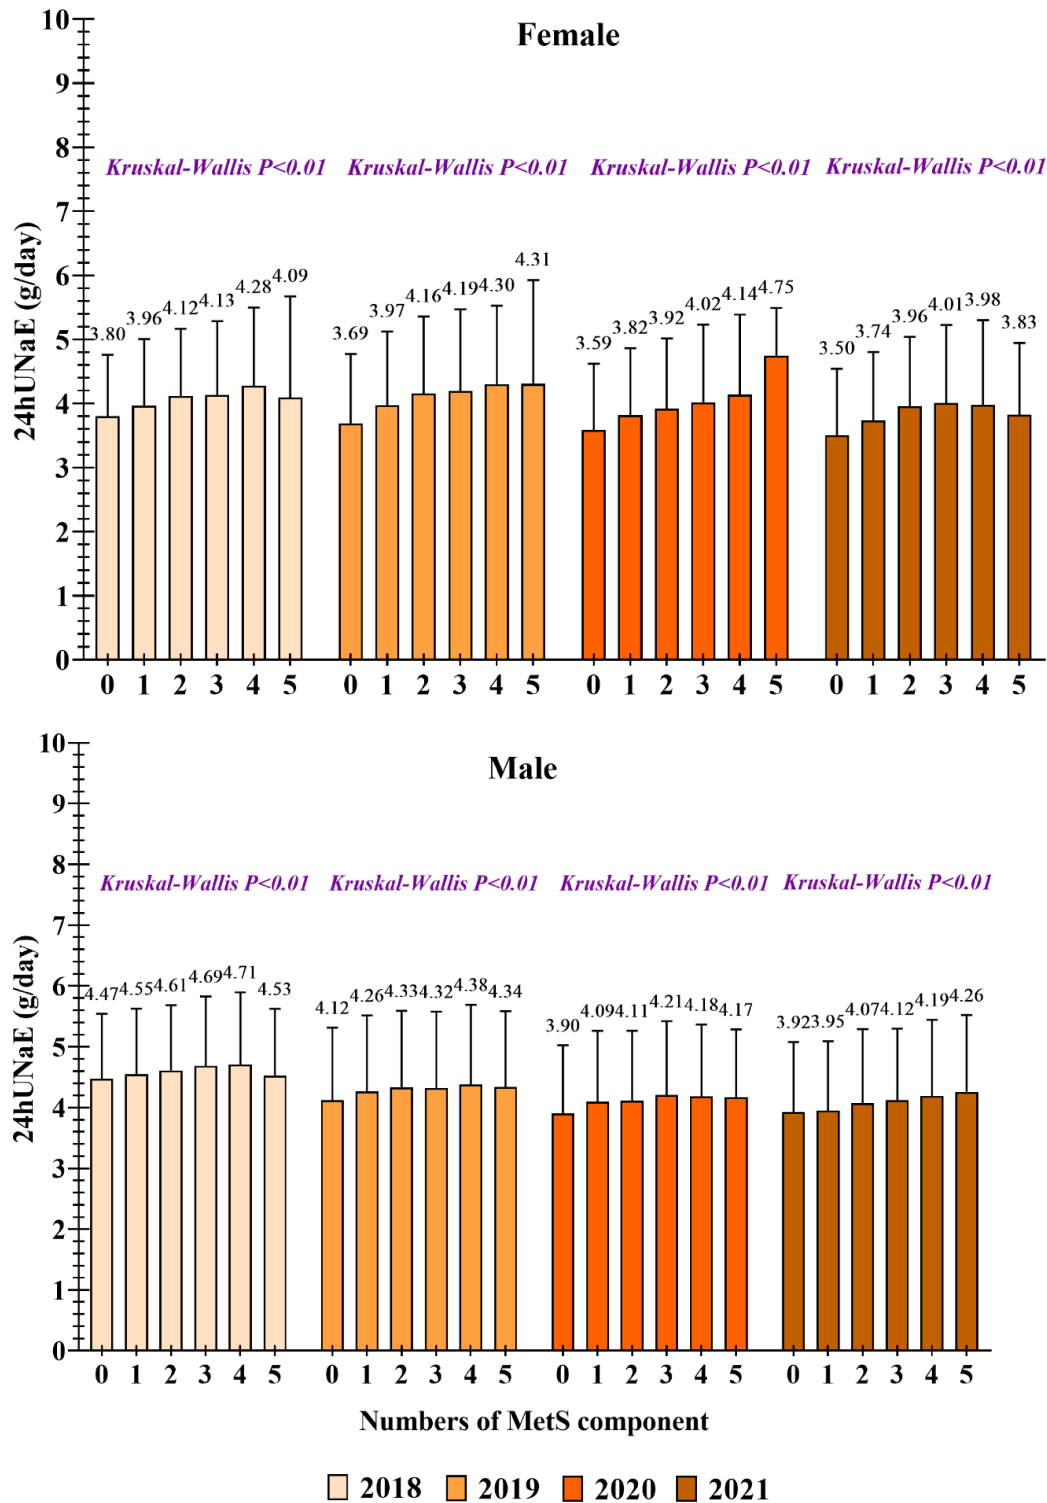

Appendix S4. Average 24hUNaE levels by the numbers of MetS components across 2018-2021

**Appendix S5. The general characteristics by various exam frequencies during 2018-2021**

| Mean±SD<br>or % (n)           | Once<br>(n=51,489) | Twice<br>(n=7,975) | Three times<br>(n=1,397) | Four times<br>(n=178) | P value <sup>1</sup> |
|-------------------------------|--------------------|--------------------|--------------------------|-----------------------|----------------------|
| Male sex                      | 55.20 (28,421)     | 65.05 (5,188)      | 65.50 (915)              | 59.55 (106)           | <0.01                |
| Age (years)                   | 44.89±12.08        | 44.45±10.72        | 46.50±9.95               | 48.53±10.26           | <0.01                |
| Height (cm)                   | 163.20±8.19        | 165.08±7.83        | 165.03±7.74              | 164.44±8.15           | <0.01                |
| Weight (kg)                   | 64.70±12.32        | 66.42±11.66        | 66.13±11.24              | 64.59±11.43           | <0.01                |
| BMI (kg/m <sup>2</sup> )      | 24.16±3.40         | 24.25±3.14         | 24.17±2.99               | 23.75±2.92            | <0.01                |
| WC (cm)                       | 82.31±10.47        | 83.22±9.84         | 83.47±9.47               | 82.74±9.46            | <0.01                |
| HC (cm)                       | 94.11±6.14         | 94.63±5.72         | 94.83±5.43               | 94.58±5.73            | <0.01                |
| WHR                           | 0.87±0.07          | 0.88±0.07          | 0.88±0.07                | 0.87±0.07             | <0.01                |
| SBP (mmHg)                    | 122.73±16.21       | 121.59±15.23       | 120.87±15.01             | 120.80±14.89          | <0.01                |
| DBP (mmHg)                    | 75.17±11.37        | 75.26±11.14        | 74.84±10.97              | 74.00±11.02           | 0.29                 |
| FBG (mmol/L)                  | 5.61±1.41          | 5.52±1.19          | 5.51±1.03                | 5.65±1.29             | <0.01                |
| TC (mmol/L)                   | 5.04±0.99          | 5.03±0.96          | 4.99±0.95                | 4.98±0.98             | 0.16                 |
| TG (mmol/L)                   | 1.88±1.91          | 1.87±1.83          | 1.81±1.77                | 1.66±1.43             | 0.01                 |
| HDL-C (mmol/L)                | 1.32±0.30          | 1.32±0.30          | 1.33±0.30                | 1.37±0.31             | <0.01                |
| LDL-C (mmol/L)                | 2.87±0.83          | 2.86±0.81          | 2.84±0.80                | 2.86±0.85             | 0.64                 |
| 24hUCrE (g/day)               | 1.37±0.40          | 1.45±0.38          | 1.42±0.36                | 1.36±0.37             | <0.01                |
| 24hUNaE (g/day)               | 4.07±1.18          | 4.24±1.15          | 4.27±1.09                | 4.30±1.09             | <0.01                |
| 24hUKE (g/day)                | 2.03±0.43          | 2.14±0.45          | 2.18±0.45                | 2.22±0.43             | <0.01                |
| Salt intake (g/day)           | 10.36±3.00         | 10.79±2.91         | 10.85±2.78               | 10.94±2.76            | <0.01                |
| Current smokers               | 26.31 (13,548)     | 28.93 (2,307)      | 25.70 (359)              | 21.91 (39)            | <0.01                |
| Current drinkers              | 28.02 (14,429)     | 35.10 (2,799)      | 34.93 (488)              | 28.65 (51)            | <0.01                |
| Physical activities           | 53.86 (27,731)     | 65.48 (5,222)      | 70.58 (986)              | 76.97 (137)           | <0.01                |
| Central obesity               | 29.37 (15,120)     | 29.53 (2,355)      | 30.85 (431)              | 26.97 (48)            | 0.57                 |
| Elevated TG                   | 37.29 (19,202)     | 37.93 (3,025)      | 35.65 (498)              | 30.90 (55)            | 0.11                 |
| Low HDL-C                     | 12.07 (6,215)      | 12.24 (976)        | 11.52 (161)              | 10.11 (18)            | 0.74                 |
| Elevated BP                   | 36.47 (18,780)     | 34.14 (2,723)      | 34.07 (476)              | 34.27 (61)            | <0.01                |
| Elevated FBG                  | 15.13 (7,792)      | 13.76 (1,097)      | 13.46 (188)              | 18.54 (33)            | 0.01                 |
| Total MetS                    | 19.41 (9,996)      | 18.27 (1,457)      | 16.68 (233)              | 10.11 (18)            | <0.01                |
| The number of MetS components |                    |                    |                          |                       | <0.01                |
| 0                             | 35.73 (18,397)     | 34.82 (2,777)      | 34.57 (483)              | 33.15 (59)            |                      |
| 1                             | 25.35 (13,055)     | 27.52 (2,195)      | 28.13 (393)              | 26.97 (48)            |                      |
| 2                             | 19.50 (10,041)     | 19.39 (1,546)      | 20.62 (288)              | 29.78 (53)            |                      |
| 3                             | 12.77 (6,573)      | 12.69 (1,012)      | 11.38 (159)              | 6.74 (12)             |                      |
| 4                             | 5.56 (2,862)       | 4.66 (372)         | 4.44 (62)                | 2.81 (5)              |                      |
| 5                             | 1.09 (561)         | 0.92 (73)          | 0.86 (12)                | 0.56 (1)              |                      |

Note: SD, standard deviance; MetS, metabolic syndromes; BMI, body mass index; WC, waist circumference; HC, hip circumference; WHR, waist to hip ratio; SBP, systolic blood pressure; DBP, diastolic blood pressure; FBG, fasting blood glucose; SCr, serum creatinine; TC, total cholesterol; TG, triglycerides; HDL-C, high density lipoprotein cholesterol; LDL-C, low density lipoprotein cholesterol; 24hUCrE, 24-hour urinary creatinine excretion (estimated); 24hUNaE, 24-hour urinary sodium excretion (estimated); 24hUKE, 24-hour urinary potassium excretion (estimated);

<sup>1</sup> P value was obtained by non-parametric Kruskal-Wallis tests for continuous variables and the Chi-square tests for categorical variables

## Appendix S6. Unadjusted associations of MetS prevalence and its components with 24-h urinary sodium excretion

| MetS and its components  | Prevalence % | Unadjusted odds ratios (95% confidence intervals) for 24-h urinary sodium excretion |                   |                   |                   |                    |                   | P value |
|--------------------------|--------------|-------------------------------------------------------------------------------------|-------------------|-------------------|-------------------|--------------------|-------------------|---------|
|                          |              | Q1                                                                                  | Q2                | Q3                | Q4                | P <sub>trend</sub> | Per unit increase |         |
| <b>Overall</b>           |              | <b>14,823</b>                                                                       | <b>14,823</b>     | <b>14,823</b>     | <b>14,823</b>     |                    | <b>59,292</b>     |         |
| Central obesity          | 29.41        | 1.00                                                                                | 1.15 (1.09, 1.21) | 1.39 (1.32, 1.46) | 1.92 (1.82, 2.02) | <0.01              | 1.38 (1.36, 1.40) | <0.01   |
| Elevated TG              | 37.39        | 1.00                                                                                | 1.04 (0.99, 1.09) | 1.14 (1.09, 1.20) | 1.20 (1.14, 1.25) | <0.01              | 1.19 (1.17, 1.20) | <0.01   |
| Low HDL-C                | 12.08        | 1.00                                                                                | 0.95 (0.88, 1.01) | 0.93 (0.87, 1.00) | 0.88 (0.82, 0.94) | <0.01              | 1.08 (1.06, 1.11) | <0.01   |
| Elevated BP              | 36.20        | 1.00                                                                                | 1.18 (1.13, 1.24) | 1.31 (1.25, 1.38) | 1.60 (1.52, 1.67) | <0.01              | 1.25 (1.23, 1.27) | <0.01   |
| Elevated FBG             | 14.95        | 1.00                                                                                | 0.93 (0.88, 0.99) | 0.94 (0.88, 1.00) | 0.97 (0.91, 1.03) | 0.11               | 1.05 (1.03, 1.07) | <0.01   |
| Total MetS               | 19.27        | 1.00                                                                                | 1.05 (0.99, 1.11) | 1.15 (1.08, 1.22) | 1.36 (1.28, 1.44) | <0.01              | 1.24 (1.22, 1.26) | <0.01   |
| <b>Females</b>           |              | <b>6,447</b>                                                                        | <b>6,446</b>      | <b>6,446</b>      | <b>6,447</b>      |                    | <b>25,786</b>     |         |
| Central obesity          | 15.77        | 1.00                                                                                | 1.24 (1.11, 1.38) | 1.68 (1.51, 1.86) | 2.72 (2.47, 3.01) | <0.01              | 1.44 (1.40, 1.49) | <0.01   |
| Elevated TG              | 20.69        | 1.00                                                                                | 1.24 (1.13, 1.36) | 1.40 (1.28, 1.52) | 1.64 (1.50, 1.79) | <0.01              | 1.18 (1.15, 1.22) | <0.01   |
| Low HDL-C                | 3.31         | 1.00                                                                                | 1.04 (0.86, 1.26) | 1.00 (0.82, 1.21) | 1.05 (0.87, 1.28) | 0.92               | 0.99 (0.93, 1.06) | 0.81    |
| Elevated BP              | 26.14        | 1.00                                                                                | 1.20 (1.11, 1.31) | 1.47 (1.35, 1.59) | 2.09 (1.93, 2.26) | <0.01              | 1.32 (1.29, 1.35) | <0.01   |
| Elevated FBG             | 9.97         | 1.00                                                                                | 1.03 (0.91, 1.16) | 1.08 (0.96, 1.21) | 1.37 (1.22, 1.53) | <0.01              | 1.14 (1.10, 1.18) | <0.01   |
| Total MetS               | 7.83         | 1.00                                                                                | 1.18 (1.02, 1.36) | 1.36 (1.18, 1.56) | 2.07 (1.81, 2.35) | <0.01              | 1.32 (1.27, 1.37) | <0.01   |
| <b>Males</b>             |              | <b>8,376</b>                                                                        | <b>8,377</b>      | <b>8,377</b>      | <b>8,376</b>      |                    | <b>33,506</b>     |         |
| Central obesity          | 39.91        | 1.00                                                                                | 1.14 (1.07, 1.21) | 1.34 (1.26, 1.43) | 1.77 (1.66, 1.88) | <0.01              | 1.21 (1.19, 1.23) | <0.01   |
| Elevated TG              | 50.24        | 1.00                                                                                | 0.96 (0.91, 1.02) | 1.06 (1.00, 1.13) | 1.05 (0.99, 1.12) | <0.01              | 1.02 (1.00, 1.04) | 0.02    |
| Low HDL-C                | 18.83        | 1.00                                                                                | 0.93 (0.86, 1.00) | 0.92 (0.85, 0.99) | 0.84 (0.78, 0.91) | <0.01              | 0.95 (0.92, 0.97) | <0.01   |
| Elevated BP              | 43.94        | 1.00                                                                                | 1.18 (1.11, 1.26) | 1.26 (1.18, 1.34) | 1.39 (1.31, 1.48) | <0.01              | 1.11 (1.09, 1.13) | <0.01   |
| Elevated FBG             | 18.79        | 1.00                                                                                | 0.90 (0.83, 0.97) | 0.88 (0.82, 0.95) | 0.82 (0.76, 0.89) | <0.01              | 0.94 (0.91, 0.96) | <0.01   |
| Total MetS               | 28.08        | 1.00                                                                                | 1.03 (0.96, 1.10) | 1.12 (1.04, 1.20) | 1.24 (1.16, 1.33) | <0.01              | 1.08 (1.06, 1.10) | <0.01   |
| <b>Aged &lt;60 years</b> |              | <b>13,110</b>                                                                       | <b>13,208</b>     | <b>13,221</b>     | <b>13,285</b>     |                    | <b>52,824</b>     |         |
| Central obesity          | 28.55        | 1.00                                                                                | 1.16 (1.10, 1.23) | 1.40 (1.33, 1.48) | 1.94 (1.83, 2.04) | <0.01              | 1.40 (1.38, 1.43) | <0.01   |
| Elevated TG              | 37.61        | 1.00                                                                                | 1.02 (0.97, 1.08) | 1.14 (1.09, 1.20) | 1.19 (1.13, 1.25) | <0.01              | 1.20 (1.18, 1.22) | <0.01   |
| Low HDL-C                | 12.46        | 1.00                                                                                | 0.94 (0.87, 1.01) | 0.94 (0.87, 1.01) | 0.90 (0.84, 0.97) | 0.04               | 1.10 (1.08, 1.12) | <0.01   |
| Elevated BP              | 32.63        | 1.00                                                                                | 1.21 (1.14, 1.27) | 1.37 (1.30, 1.44) | 1.69 (1.60, 1.78) | <0.01              | 1.29 (1.27, 1.31) | <0.01   |
| Elevated FBG             | 13.05        | 1.00                                                                                | 0.96 (0.89, 1.03) | 1.00 (0.93, 1.07) | 1.03 (0.96, 1.10) | 0.31               | 1.08 (1.06, 1.11) | <0.01   |
| Total MetS               | 18.32        | 1.00                                                                                | 1.05 (0.98, 1.12) | 1.18 (1.11, 1.26) | 1.39 (1.30, 1.48) | <0.01              | 1.27 (1.25, 1.30) | <0.01   |
| <b>Aged ≥60 years</b>    |              | <b>1,713</b>                                                                        | <b>1,615</b>      | <b>1,602</b>      | <b>1,538</b>      |                    | <b>6,468</b>      |         |
| Central obesity          | 36.47        | 1.00                                                                                | 1.08 (0.93, 1.25) | 1.35 (1.17, 1.56) | 1.90 (1.65, 2.19) | <0.01              | 1.24 (1.19, 1.30) | <0.01   |
| Elevated TG              | 35.59        | 1.00                                                                                | 1.16 (1.01, 1.34) | 1.16 (1.00, 1.33) | 1.27 (1.10, 1.47) | 0.01               | 1.06 (1.02, 1.11) | 0.01    |
| Low HDL-C                | 8.98         | 1.00                                                                                | 1.03 (0.83, 1.29) | 0.83 (0.66, 1.05) | 0.62 (0.48, 0.80) | <0.01              | 0.91 (0.85, 0.98) | 0.02    |
| Elevated BP              | 65.34        | 1.00                                                                                | 1.21 (1.05, 1.39) | 1.21 (1.05, 1.40) | 1.48 (1.28, 1.71) | <0.01              | 1.15 (1.10, 1.20) | <0.01   |
| Elevated FBG             | 30.53        | 1.00                                                                                | 0.87 (0.75, 1.01) | 0.75 (0.65, 0.87) | 0.82 (0.70, 0.95) | <0.01              | 0.95 (0.91, 1.00) | 0.04    |
| Total MetS               | 27.09        | 1.00                                                                                | 1.09 (0.93, 1.27) | 1.02 (0.87, 1.19) | 1.27 (1.09, 1.48) | 0.01               | 1.10 (1.05, 1.16) | <0.01   |

Note: MetS, metabolic syndrome; OR, odds ratio; CI, confidence interval; Q, quartile; TG, triglyceride; HDL-C, high-density lipoprotein cholesterol; BP, blood pressure; FBG, fasting blood glucose; 24hUKE, 24-hour urinary potassium excretion
